# Supplementary material for: Adipose group 1 innate lymphoid cells promote adipose tissue fibrosis and diabetes in obesity
Source: PubMed Central journal article supplement (PMC6646407; doi:10.1038/s41467-019-11270-1), 2019-07-22
Supplement: 41467_2019_11270_MOESM1_ESM.pdf [file 41467_2019_11270_MOESM1_ESM.pdf]

## **Supplementary information**

**Wang et al.**

**Adipose group 1 innate lymphoid cells promote adipose tissue fibrosis and diabetes in obesity**

## Supplementary Tables

**Supplementary Table 1** Characteristics of participants whose adipose tissue samples were analyzed

|                                                           | Control              | Obese     | Obese<br>T2D | <i>P</i> values |                         |                                |                              |
|-----------------------------------------------------------|----------------------|-----------|--------------|-----------------|-------------------------|--------------------------------|------------------------------|
|                                                           |                      |           |              | Overall         | Control<br>vs.<br>Obese | Control<br>vs.<br>Obese<br>T2D | Obese<br>vs.<br>Obese<br>T2D |
| N                                                         | 24                   | 21        | 20           | -               | -                       | -                              | -                            |
| Age (years)                                               | 42.4±6.7             | 41.5±13.5 | 38.9±11.6    | 0.554           | -                       | -                              | -                            |
| Male, n (%)                                               | 6(25.0)              | 5(23.8)   | 6(30.0)      | 0.896           | -                       | -                              | -                            |
| BMI (kg m <sup>-2</sup> )                                 | 24.2±2.7             | 35.5±7.4  | 38.6±5.3     | 0.000           | 0.000                   | 0.000                          | 0.073                        |
| HbA1c (%)                                                 | 5.3±0.5              | 5.7±0.3   | 8.8±1.2      | 0.000           | 0.076                   | 0.000                          | 0.000                        |
| Fasting glucose<br>(mmol l <sup>-1</sup> )                | 4.7±0.4              | 5.3±0.5   | 11.0±3.5     | 0.000           | 0.304                   | 0.000                          | 0.000                        |
| 2h blood glucose<br>(mmol l <sup>-1</sup> )               | 5.7±0.9 <sup>a</sup> | 7.1±1.6   | 16.8±4.1     | 0.000           | 0.314                   | 0.000                          | 0.000                        |
| Fasting insulin (mIU<br>ml <sup>-1</sup> )                | 5.7±7.6              | 21.6±13.7 | 28.7±14.2    | 0.000           | 0.000                   | 0.000                          | 0.066                        |
| HOMA-IR (units)                                           | 1.2±1.5              | 5.3±3.7   | 13.8±8.1     | 0.000           | 0.008                   | 0.000                          | 0.000                        |
| Triglycerides (mmol<br>l <sup>-1</sup> )                  | 1.2±0.5              | 1.8±0.8   | 4.3±3.6      | 0.000           | 0.394                   | 0.000                          | 0.000                        |
| Total cholesterol<br>(mmol l <sup>-1</sup> )              | 4.4±0.7              | 4.7±0.8   | 5.1±1.1      | 0.038           | 0.390                   | 0.012                          | 0.095                        |
| HDL-C (mmol l <sup>-1</sup> )                             | 1.2±0.3              | 1.1±0.3   | 1.0±0.1      | 0.007           | 0.170                   | 0.002                          | 0.068                        |
| LDL-C (mmol l <sup>-1</sup> )                             | 2.6±0.6              | 2.9±0.6   | 2.6±0.6      | 0.208           | -                       | -                              | -                            |
| Fasting FFA (mmol<br>l <sup>-1</sup> )                    | 0.45±0.1             | 0.7±0.1   | 0.7±0.1      | 0.000           | 0.000                   | 0.000                          | 0.130                        |
| Adipo-IR (mIU<br>ml <sup>-1</sup> ×mmol l <sup>-1</sup> ) | 2.4±2.9              | 14.7±10.6 | 21.0±12.6    | 0.000           | 0.000                   | 0.000                          | 0.039                        |

BMI, body mass index; HOMA-IR, homeostasis model assessment-insulin resistance; HDL-C, high-density lipoprotein cholesterol; LDL-C, low-density lipoprotein cholesterol; Adipo-IR, adipose insulin resistance index. All data are presented as mean±SD or n (%). Comparisons are by ANOVA and, when appropriate, LSD post-hoc test. <sup>a</sup>, 13 non-obese control subjects were missing.

**Supplementary Table 2** Clinical parameters of subjects pre-surgery and 3 months post-surgery

|                                                        | Obese       |                       |                |           | Obese-T2DM  |                       |                |           |                     |
|--------------------------------------------------------|-------------|-----------------------|----------------|-----------|-------------|-----------------------|----------------|-----------|---------------------|
|                                                        | pre-surgery | 3 months post-surgery | <i>P</i> value | Change    | pre-surgery | 3 months post-surgery | <i>P</i> value | Change    | <i>P</i> for change |
| N                                                      | 19          | -                     | -              | -         | 17          | -                     | -              | -         | -                   |
| Age (years)                                            | 35.2±9.9    | -                     | -              | -         | 36.9±10.9   | -                     | -              | -         | -                   |
| Male, n (%)                                            | 6(31.6)     | -                     | -              | -         | 3(17.6)     | -                     | -              | -         | -                   |
| BMI (kg m <sup>-2</sup> )                              | 38.4±6.9    | 31.8±5.2              | 0.002          | 6.6±7.3   | 38.7±4.9    | 31.8±4.0              | <0.001         | 6.9±1.8   | 0.861               |
| HbA1c (%)                                              | 5.7±0.9     | 5.1±0.3               | 0.023          | 0.5±1.0   | 8.9±1.4     | 5.5±0.7               | <0.001         | 3.5±1.1   | 0.000               |
| Fasting glucose (mmol l <sup>-1</sup> )                | 5.6±0.7     | 5.0±0.4               | 0.004          | 0.6±0.7   | 11.4±3.8    | 5.6±0.7               | <0.001         | 5.8±3.6   | 0.000               |
| 2 h post (mmol l <sup>-1</sup> )                       | 7.0±1.7     | NA                    | -              | -         | 17.1±4.5    | 6.8±1.9               | <0.001         | 10.3±4.2  | -                   |
| Fasting insulin (mIU ml <sup>-1</sup> )                | 26.4±11.0   | 11.6±3.7              | <0.001         | 14.7±10.2 | 34.7±21.4   | 15.0±7.2              | <0.001         | 19.7±16.0 | 0.265               |
| HOMA-IR (units)                                        | 6.8±3.3     | 2.6±0.9               | <0.001         | 4.2±3.1   | 16.6±9.5    | 3.6±1.5               | <0.001         | 13.0±8.8  | 0.000               |
| Triglycerides (mmol l <sup>-1</sup> )                  | 1.8±0.7     | 1.1±0.3               | <0.001         | 0.8±0.6   | 4.8±3.8     | 1.4±0.5               | 0.001          | 3.4±3.7   | 0.004               |
| Total cholesterol (mmol l <sup>-1</sup> )              | 4.7±0.8     | 4.1±0.7               | 0.000          | 0.6±0.6   | 5.1±1.2     | 3.9±0.7               | <0.001         | 1.3±0.9   | 0.012               |
| HDL-C (mmol l <sup>-1</sup> )                          | 1.2±0.3     | 1.2±1.4               | 0.229          | 0.1±0.2   | 1.0±0.1     | 1.0±0.2               | 0.498          | 0.0±0.2   | 0.675               |
| LDL-C (mmol l <sup>-1</sup> )                          | 2.9±0.7     | 2.2±0.6               | 0.000          | 0.7±0.7   | 2.9±0.6     | 2.2±0.6               | 0.125          | 0.3±0.7   | 0.136               |
| Fasting FFA (mmol l <sup>-1</sup> )                    | 0.6±0.1     | 0.4±0.2               | 0.000          | 0.2±0.2   | 0.7±0.1     | 0.4±0.1               | <0.001         | 0.4±0.2   | 0.076               |
| Adipo-IR (mIU ml <sup>-1</sup> ×mmol l <sup>-1</sup> ) | 17.0±9.1    | 4.3±2.6               | <0.001         | 12.7±9.2  | 25.1±15.6   | 5.2±3.1               | <0.001         | 19.9±14.1 | 0.075               |

BMI, body mass index; HOMA-IR, homeostasis model assessment-insulin resistance; HDL-C, high-density lipoprotein cholesterol; LDL-C, low-density lipoprotein cholesterol; Adipo-IR, adipose insulin resistance index. All data are presented as mean±SD or n (%). Comparisons are by ANOVA and, when appropriate, LSD post-hoc test. NA, not applicable.

**Supplementary Table 3** Correlations between the percentage of positively stained area indicated for adipose tissue fibrosis and BMI, HOMA-IR, and Adipo-IR

|                                                           | Trichrome positive area<br>(% of WAT area) |       |
|-----------------------------------------------------------|--------------------------------------------|-------|
|                                                           | r                                          | P     |
| BMI (kg m <sup>-2</sup> )                                 | 0.785                                      | 0.000 |
| HOMA-IR<br>(units)                                        | 0.714                                      | 0.000 |
| Adipo-IR<br>(mIU ml <sup>-1</sup> ×mmol l <sup>-1</sup> ) | 0.658                                      | 0.000 |

**Supplementary Table 4** Primers used in this study

For human studies:

| Number | Gene           | Forward (5'-3')         | Reverse (5'-3')        |
|--------|----------------|-------------------------|------------------------|
| 1      | <i>COL1A1</i>  | GAGGGCCAAGACGAAGACATC   | CAGATCACGTCATCGCACAAAC |
| 2      | <i>COL3A1</i>  | GGAGCTGGCTACTTCTCGC     | GGGAACATCCTCCTTCAACAG  |
| 3      | <i>MMP-2</i>   | TACAGGATCATTGGCTACACACC | GGTCACATCGCTCCAGACT    |
| 4      | <i>MMP-9</i>   | TGTACCGCTATGGTTACTCTCG  | GGCAGGGACAGTTGCTTCT    |
| 5      | <i>TIMP-1</i>  | CTTCTGCAATTCCGACCTCGT   | ACGCTGGTATAAGGTGGTCTG  |
| 6      | <i>LOX</i>     | CGGCGGAGGAAAAGTGTCT     | TCGGCTGGGTAAGAAATCTGA  |
| 7      | <i>MINCLE</i>  | AAGAACTGCTCAGCCATGGG    | CCTGCTCCTCTGTGAGTTGA   |
| 8      | <i>iNOS</i>    | TTCAGTATCACAACCTCAGCAAG | TGGACCTGCAAGTAAAATCCC  |
| 9      | <i>TGFB1</i>   | GGCCAGATCCTGTCCAAGC     | GTGGGTTTCCACCATTAGCAC  |
| 10     | <i>β-ACTIN</i> | GTTGCTATCCAGGCTGTG      | TGATCTTGATCTTCATTGTG   |

For animal studies:

| Number | Gene           | Forward (5'-3')         | Reverse (5'-3')          |
|--------|----------------|-------------------------|--------------------------|
| 1      | <i>Colla1</i>  | TGCTGGTCCCAAAGGTTC      | CAGGGCGACCATCTTGAC       |
| 2      | <i>Col3a1</i>  | ATGCCACAGCCTTCTACAC     | ACCAGTTGGACATGATTCACAG   |
| 3      | <i>Mincle</i>  | ACCAAATCGCCTGCATCC      | CACTTGGGAGTTTTTGAAGCATC  |
| 4      | <i>iNOS</i>    | CCAAGCCCTCACCTACTTCC    | CTCTGAGGGCTGACACAAGG     |
| 5      | <i>Tgfb1</i>   | CCTGACTGGCTGTCTTTTGACG  | AGTGAGCGCTGAATCGAAAGC    |
| 6      | <i>Pdgfb</i>   | CCATCCGCTCCTTTGATGAT    | TCAGCCCCATCTTCATCTACG    |
| 7      | <i>Acta2</i>   | GTTCAGTGGTGCCTCTGTCA    | ACTGGGACGACATGGAAAAG     |
| 8      | <i>Il-6</i>    | CCTTCTTGGGACTGATGCTGGTG | AGGTCTGTTGGGAGTGGTATCCTC |
| 10     | <i>TNF-α</i>   | AGCCGATGGGTTGTACCTTG    | GTGGGTGAGGAGCACGTAGTC    |
| 11     | <i>β-actin</i> | CCACAGCTGAGAGGGAAATC    | AAGGAAGGCTGGAAAAGAGC     |

## Supplementary Figures

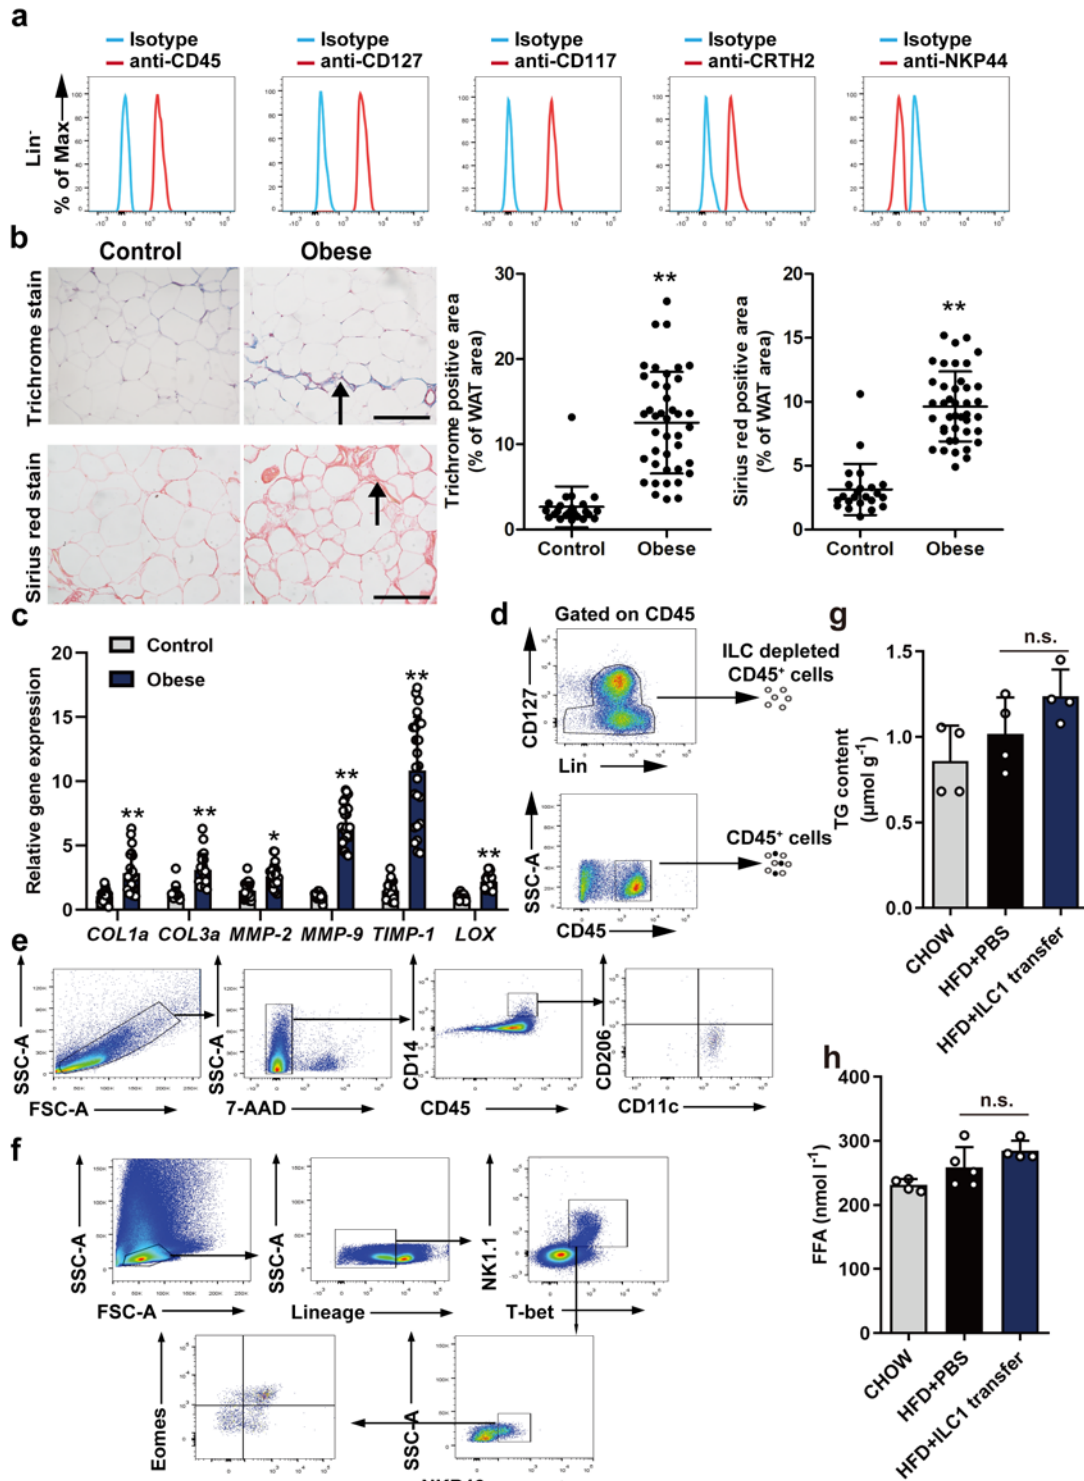

**Supplementary Figure 1.** **a** Flow cytometry analysis of cells stained with isotype controls for CD45, CD127, CD117, CRTH2, and NKP44. **b** Representative Masson's trichrome C and Sirius red staining in omental adipose tissue samples from control subjects and obese subjects (scale bar: 100 $\mu\text{m}$ ). Quantitation of Masson's trichrome C and Sirius red staining by Image J software from NIH was performed (n=24 and 41,

respectively). \*\*  $P < 0.01$  vs. control group (unpaired two-way Student's  $t$  test). **c** Expression levels of fibrosis related genes in control subjects and obese subjects (n=24 per group). \*\*  $P < 0.01$  vs. control group (unpaired two-way Student's  $t$  test). **d** Sorting strategy by flow cytometry. **e** Analysis of macrophages in human adipose tissue by flow cytometry. **f** Representative flow cytometric analysis for adipose ILC1s in SVFs. **g,h** Hepatic TG levels and serum FFA levels. n.s., no significance (two-way ANOVA tests followed by Bonferroni post hoc test). Data are representative of three independent experiments, with n = 4-6 mice per group. Error bars indicate s.d..

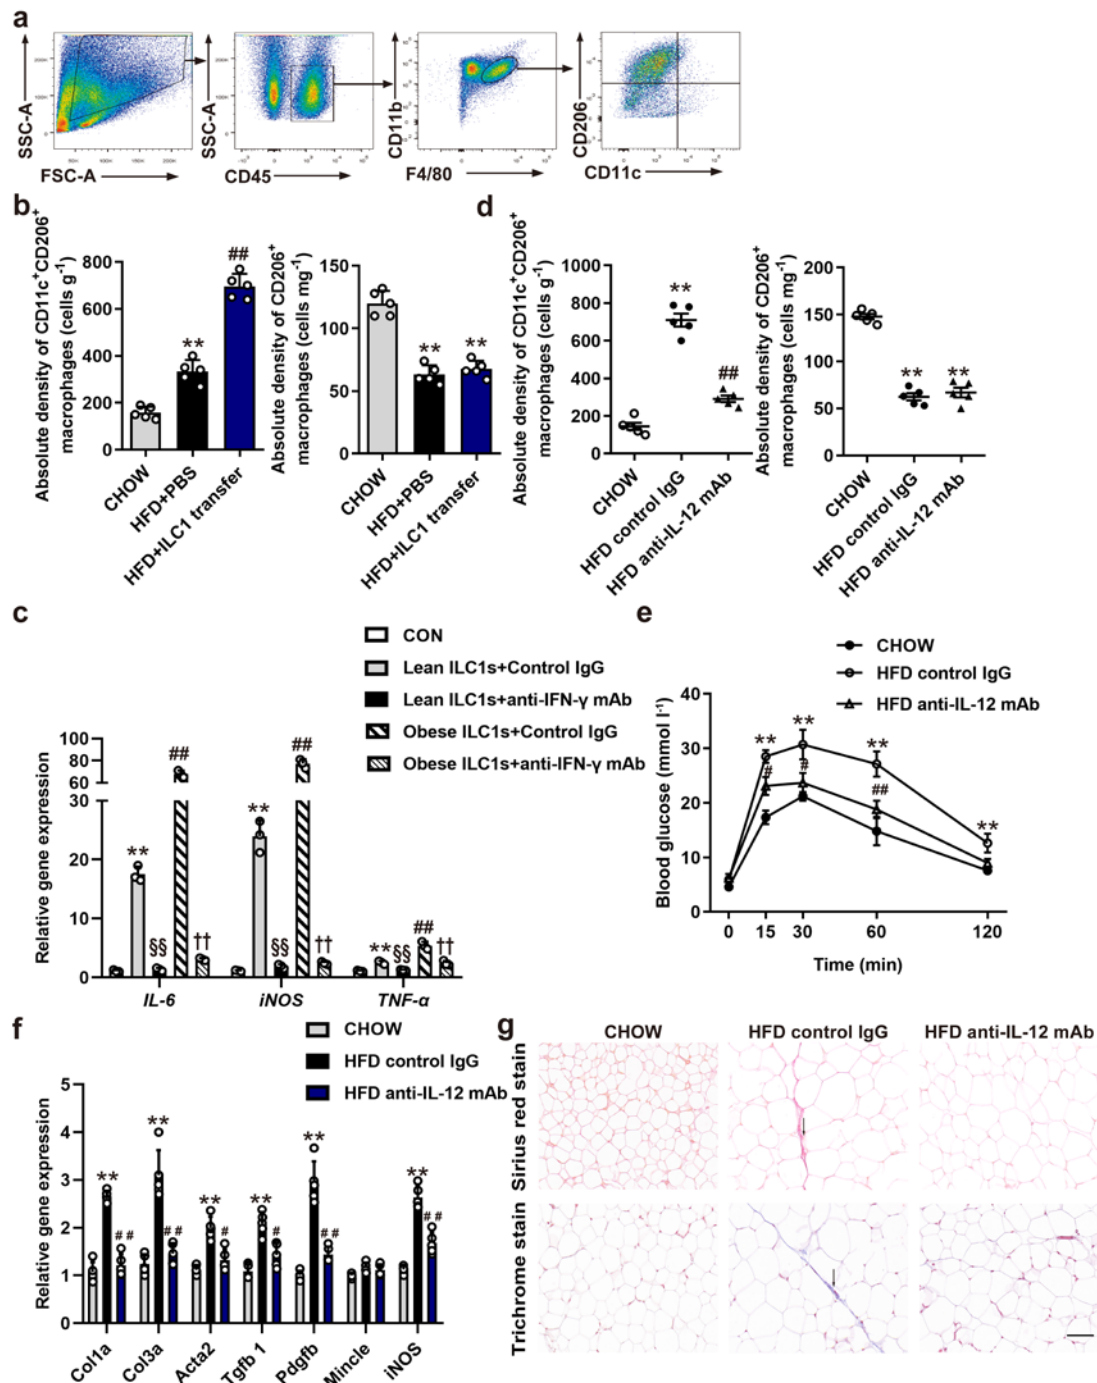

**Supplementary Figure 2.** **a** Representative flow cytometric analysis for ATMs in mice. **b** Absolute density of CD11c<sup>+</sup>CD206<sup>+</sup> and CD206<sup>+</sup> macrophages in VAT of mice with different treatment. Data are representative of three independent experiments, with n = 4-6 mice per group. \*\*P<0.01 vs. CHOW group; ###P<0.01 vs. HFD+PBS group (two-way ANOVA tests followed by Bonferroni post hoc test). **c** Adipose ILC1s (2×10<sup>4</sup> cells well<sup>-1</sup>) sorted from VAT of lean and obese mice were co-cultured with BMDMs (2×10<sup>5</sup> cells well<sup>-1</sup>) in 24-well plates using a transwell system. Recombinant mouse IL-12 (20 ng ml<sup>-1</sup>) and IL-18 (20 ng ml<sup>-1</sup>) were added in the upper chamber, with neutralizing IFN-γ antibody (20 ng ml<sup>-1</sup>) or isotype control IgG (20 ng ml<sup>-1</sup>) supplemented in separate group. \*\*P<0.01 vs. control group; §§

$P < 0.01$  vs. Lean ILC1s+Control IgG group;  $^{##} P < 0.01$  vs. Lean ILC1s+Control IgG group;  $^{\dagger\dagger} P < 0.01$  vs. Obese ILC1s+Control IgG group (two-way ANOVA tests followed by Bonferroni post hoc test). Data are representative of three independent experiments. **d** Absolute density of CD11c<sup>+</sup>CD206<sup>+</sup> and CD206<sup>+</sup> macrophages in VAT of mice with different treatment.  $^{**} P < 0.01$  vs. CHOW group;  $^{##} P < 0.01$  vs. HFD+Control IgG group (two-way ANOVA tests followed by Bonferroni post hoc test). Data are representative of two independent experiments, with  $n = 5$  mice per group. **e-g** C57BL/6 mice were fed with normal diet or HFD, while mice in the HFD group were randomized into two groups of HFD anti-IL-12 mAb group and HFD control IgG group and continued with HFD feeding for another 4 weeks. HFD anti-IL-12 mAb group received rat anti-murine anti-IL-12p35 mAb administration via intraperitoneal injection at 250  $\mu$ g per mouse every 3 days for 4 weeks; HFD control IgG group received the same dose of control IgG. **(e)** Glucose tolerance test. **(f)** Expression levels of fibrosis related genes, assessed by q-PCR. **(g)** Representative Masson's trichrome C and Sirius red staining in VAT of mice with different treatment.  $^{**} P < 0.01$  vs. respective CHOW group;  $^{\#} P < 0.05$  vs. HFD+control IgG group;  $^{##} P < 0.01$  vs. HFD+control IgG group (two-way ANOVA tests followed by Bonferroni post hoc test). Data are representative of two independent experiments, with  $n = 5-6$  mice per group. Error bars indicate s.d..



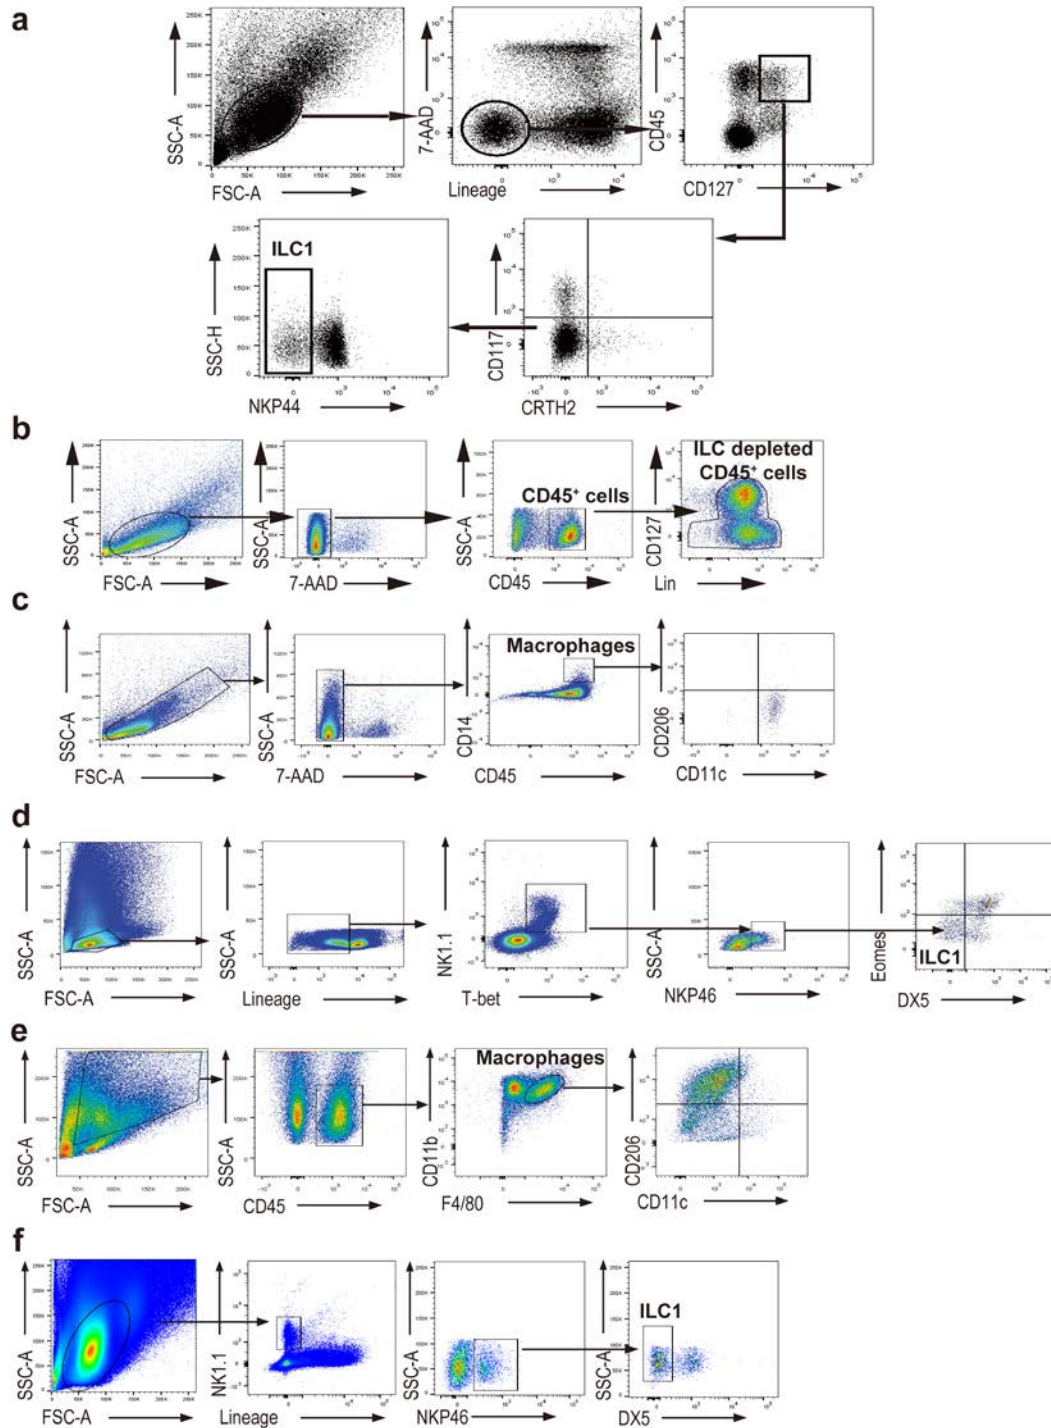

**Supplementary Figure 3.** Gating strategies used for cell identification and sorting. **a** Gating strategy to identify human adipose and circulating ILC1 (Lin<sup>-</sup>CD45<sup>+</sup>CD127<sup>+</sup>CD117<sup>-</sup>CRTH2<sup>-</sup>NKP44<sup>-</sup>) cells for analyses presented on Fig. 1b-k,2a. **b** Gating strategy to sort adipose CD45<sup>+</sup> cells or ILCs depleted CD45<sup>+</sup> cells from the SVFs of obese T2D patients for in-vitro co-culture assay presented on Fig. 2d,e. **c** Gating strategy to identify human adipose macrophages (CD45<sup>+</sup>CD14<sup>+</sup>CD11c<sup>+</sup>) for analyses presented on Fig. 2d. **d** Gating strategy to identify adipose ILC1s (Lin<sup>-</sup>NK1.1<sup>+</sup>NKP46<sup>+</sup>T-bet<sup>+</sup>Eomes<sup>-</sup>DX5<sup>-</sup>) from *Prkdc*<sup>-/-</sup>*IL2rg*<sup>-/-</sup> and *Rag1*<sup>-/-</sup> mice for analyses presented on Fig. 3b,6a. **e** Gating strategy to identify adipose ATMs

(CD45<sup>+</sup>CD11b<sup>+</sup>F4/80<sup>+</sup>) from *Prkdc*<sup>-/-</sup>*IL2rg*<sup>-/-</sup> and *Rag1*<sup>-/-</sup> mice for analyses presented on Fig. 4b,6c. **f** Gating strategy to sort adipose ILC1s from C57BL/6 and *Ifng*<sup>-/-</sup> mice for adoptive transfer assay presented on Fig. 3a,5a.

## **Supplementary Methods**

### **Bone Marrow Derived Macrophages Isolation**

BMDMs were isolated from C57BL/6 mice fed a normal diet as previously described<sup>1</sup>. In brief, bone marrow cells were flushed out from femur, resuspended and grown in DMEM/F12-10 medium (10% FBS and 1% penicillin and streptomycin) containing 10 ng ml<sup>-1</sup> M-CSF (PeproTech). Fresh growth medium was added on day 3. Macrophages were harvested on day 7 and replated for further experiment.

### **Co-culture experiments**

As for the co-culture experiment, a transwell system (BD Biosciences) was used. Adipose ILC1s were sorted from C57BL/6 mice fed a normal diet or HFD diet for 4 weeks by flow cytometry. About  $2 \times 10^5$  BMDMs were seeded in 24-well plate and co-cultured with adipose ILC1s ( $2 \times 10^4$  cells well<sup>-1</sup>) in the presence of neutralizing IFN- $\gamma$  antibody (BioXCell, #BP0055) or IgG isotype control antibody (BioXCell, #BP0290). Meanwhile, recombinant mouse IL-12 (R&D Systems, #419-ML) and IL-18 (R&D Systems, #9139-IL) were added in the upper chamber. After co-culture for 24 hours, BMDMs were collected for further detection.

## Supplementary References

1. Zhang X, Goncalves R, Mosser DM. The isolation and characterization of murine macrophages. *Current protocols in immunology* **Chapter 14**, Unit 14 11 (2008).
