# Supplementary material for: Adipose group 1 innate lymphoid cells promote adipose tissue fibrosis and diabetes in obesity
Source: PubMed Central journal article supplement (PMC6646407; doi:10.1038/s41467-019-11270-1), 2019-07-22
Supplement: 41467_2019_11270_MOESM2_ESM.pdf [file 41467_2019_11270_MOESM2_ESM.pdf]

## Reporting Summary

Nature Research wishes to improve the reproducibility of the work that we publish. This form provides structure for consistency and transparency in reporting. For further information on Nature Research policies, see [Authors & Referees](#) and the [Editorial Policy Checklist](#).

### Statistics

For all statistical analyses, confirm that the following items are present in the figure legend, table legend, main text, or Methods section.

n/a Confirmed

- The exact sample size ( $n$ ) for each experimental group/condition, given as a discrete number and unit of measurement
- A statement on whether measurements were taken from distinct samples or whether the same sample was measured repeatedly
- The statistical test(s) used AND whether they are one- or two-sided  
*Only common tests should be described solely by name; describe more complex techniques in the Methods section.*
- A description of all covariates tested
- A description of any assumptions or corrections, such as tests of normality and adjustment for multiple comparisons
- A full description of the statistical parameters including central tendency (e.g. means) or other basic estimates (e.g. regression coefficient) AND variation (e.g. standard deviation) or associated estimates of uncertainty (e.g. confidence intervals)
- For null hypothesis testing, the test statistic (e.g.  $F$ ,  $t$ ,  $r$ ) with confidence intervals, effect sizes, degrees of freedom and  $P$  value noted  
*Give  $P$  values as exact values whenever suitable.*
- For Bayesian analysis, information on the choice of priors and Markov chain Monte Carlo settings
- For hierarchical and complex designs, identification of the appropriate level for tests and full reporting of outcomes
- Estimates of effect sizes (e.g. Cohen's  $d$ , Pearson's  $r$ ), indicating how they were calculated

*Our web collection on [statistics for biologists](#) contains articles on many of the points above.*

### Software and code

Policy information about [availability of computer code](#)

Data collection

Data analysis

For manuscripts utilizing custom algorithms or software that are central to the research but not yet described in published literature, software must be made available to editors/reviewers. We strongly encourage code deposition in a community repository (e.g. GitHub). See the Nature Research [guidelines for submitting code & software](#) for further information.

### Data

Policy information about [availability of data](#)

All manuscripts must include a [data availability statement](#). This statement should provide the following information, where applicable:

- Accession codes, unique identifiers, or web links for publicly available datasets
- A list of figures that have associated raw data
- A description of any restrictions on data availability

### Field-specific reporting

Please select the one below that is the best fit for your research. If you are not sure, read the appropriate sections before making your selection.

- Life sciences       Behavioural & social sciences       Ecological, evolutionary & environmental sciences

For a reference copy of the document with all sections, see [nature.com/documents/nr-reporting-summary-flat.pdf](https://www.nature.com/documents/nr-reporting-summary-flat.pdf)

## Life sciences study design

All studies must disclose on these points even when the disclosure is negative.

|                 |                                                                                                                             |
|-----------------|-----------------------------------------------------------------------------------------------------------------------------|
| Sample size     | Sample size were chosen based on prior knowledge for obtaining significant p-values from the type of experiment performed.  |
| Data exclusions | No data were excluded.                                                                                                      |
| Replication     | All experiments were replicated at least twice and often more times as mentioned in the manuscript.                         |
| Randomization   | Animals were randomized to diet experimental groups.                                                                        |
| Blinding        | The quantitative histological analysis was performed by two investigators who had no knowledge of the origin of the slides. |

## Reporting for specific materials, systems and methods

We require information from authors about some types of materials, experimental systems and methods used in many studies. Here, indicate whether each material, system or method listed is relevant to your study. If you are not sure if a list item applies to your research, read the appropriate section before selecting a response.

### Materials & experimental systems

| n/a                                 | Included in the study                                           |
|-------------------------------------|-----------------------------------------------------------------|
| <input type="checkbox"/>            | <input checked="" type="checkbox"/> Antibodies                  |
| <input checked="" type="checkbox"/> | <input type="checkbox"/> Eukaryotic cell lines                  |
| <input checked="" type="checkbox"/> | <input type="checkbox"/> Palaeontology                          |
| <input type="checkbox"/>            | <input checked="" type="checkbox"/> Animals and other organisms |
| <input type="checkbox"/>            | <input checked="" type="checkbox"/> Human research participants |
| <input type="checkbox"/>            | <input checked="" type="checkbox"/> Clinical data               |

### Methods

| n/a                                 | Included in the study                              |
|-------------------------------------|----------------------------------------------------|
| <input checked="" type="checkbox"/> | <input type="checkbox"/> ChIP-seq                  |
| <input type="checkbox"/>            | <input checked="" type="checkbox"/> Flow cytometry |
| <input checked="" type="checkbox"/> | <input type="checkbox"/> MRI-based neuroimaging    |

## Antibodies

|                 |                                                                                                                                                                                                                                                                                                                                                                                                                                                                                                                                                                                                                                                                                                                                                      |
|-----------------|------------------------------------------------------------------------------------------------------------------------------------------------------------------------------------------------------------------------------------------------------------------------------------------------------------------------------------------------------------------------------------------------------------------------------------------------------------------------------------------------------------------------------------------------------------------------------------------------------------------------------------------------------------------------------------------------------------------------------------------------------|
| Antibodies used | CD3 (UCHT1), CD19 (HIB19), CD16 (B73.1), CD45 (2D1), CD127 (HIL-7R-M21), CD117 (YB5, B8), CRTH2 (BM16), NKP44 (p44-8), CD206 (19.2), CD14 (M5E2), CD11c (Bu15), CD5 (L17F12), TCR $\alpha\beta$ (IP26), FCER1A (AER-37), TCR $\beta$ (H57-597), CD3 (17A2), CD19 (1D3), TCR $\gamma\delta$ (GL3), Ly-6G (1A8), F4/80 (BM8), NK1.1 (PK136), NKP46 (29A1.4), DX5 (DX5), Eomes (1219A), T-bet (4B10), CD11b (M1/70), CD11c (N418), IFN- $\gamma$ (4S.B3), CD206 (Co68C2) and CD45 (A20) were purchased from BioLegend, R&D Systems, or BD Biosciences. Phosphorylated Smad3 (ab52903), total Smad3 (ab40854), GAPDH (ab8245), pSTAT1 (ab109461), F4/80 (ab6640), $\alpha$ SMA (ab7817) and TGF- $\beta$ 1 antibody (ab92486) were purchased from Abcam. |
| Validation      | We used only previously published and validated or commercial antibodies.                                                                                                                                                                                                                                                                                                                                                                                                                                                                                                                                                                                                                                                                            |

## Animals and other organisms

Policy information about [studies involving animals](#); [ARRIVE guidelines](#) recommended for reporting animal research

|                         |                                                                                                                                                                                                     |
|-------------------------|-----------------------------------------------------------------------------------------------------------------------------------------------------------------------------------------------------|
| Laboratory animals      | The mice used in this study were included in method and figure legend section of the manuscript. C57BL/6, Rag1 $^{-/-}$ , Ifng $^{-/-}$ and Prkdc $^{-/-}$ IL2rg $^{-/-}$ mice were used.           |
| Wild animals            | The study did not involve wild mice.                                                                                                                                                                |
| Field-collected samples | The study did not involve samples collected from the field.                                                                                                                                         |
| Ethics oversight        | All animal studies were performed according to guidelines established by the Research Animal Care Committee of Drum Tower Hospital Affiliated to Nanjing University Medical School, Nanjing, China. |

Note that full information on the approval of the study protocol must also be provided in the manuscript.

## Human research participants

Policy information about [studies involving human research participants](#)

|                            |                                                                                                                                                                                                                                                                                                                                                                                            |
|----------------------------|--------------------------------------------------------------------------------------------------------------------------------------------------------------------------------------------------------------------------------------------------------------------------------------------------------------------------------------------------------------------------------------------|
| Population characteristics | Clinical and biochemical characteristics of the enrolled subjects are summarized in tables. Periumbilical adipose tissue samples at the omental region were obtained from 21 obese subjects, 20 obese T2D patients, and 24 control subjects perioperatively. Blood samples were collected from 19 obese patients and 17 obese T2D patients 3 months after surgery at the end of the study. |
|----------------------------|--------------------------------------------------------------------------------------------------------------------------------------------------------------------------------------------------------------------------------------------------------------------------------------------------------------------------------------------------------------------------------------------|

## Recruitment

A total of 85 subjects, including 49 obese patients underwent laparoscopic Roux-en-Y gastric bypass (RYGB) surgery, and 36 age- and sex- matched non obese non T2D controls received elective abdominal surgery (e.g. hernia or hemangioma resection) were enrolled from April 2017 to December 2017 at Drum Tower Hospital Affiliated to Nanjing University Medical School.

## Ethics oversight

This study was approved by the Ethics Review Committee of Nanjing Drum Tower Hospital Affiliated to Nanjing University Medical School (Approval number: 2017-030-02).

Note that full information on the approval of the study protocol must also be provided in the manuscript.

## Clinical data

Policy information about [clinical studies](#)

All manuscripts should comply with the ICMJE [guidelines for publication of clinical research](#) and a completed [CONSORT checklist](#) must be included with all submissions.

## Clinical trial registration

NCT03296605

## Study protocol

*Note where the full trial protocol can be accessed OR if not available, explain why.*

## Data collection

*Describe the settings and locales of data collection, noting the time periods of recruitment and data collection.*

## Outcomes

*Describe how you pre-defined primary and secondary outcome measures and how you assessed these measures.*

## Flow Cytometry

### Plots

Confirm that:

- The axis labels state the marker and fluorochrome used (e.g. CD4-FITC).
- The axis scales are clearly visible. Include numbers along axes only for bottom left plot of group (a 'group' is an analysis of identical markers).
- All plots are contour plots with outliers or pseudocolor plots.
- A numerical value for number of cells or percentage (with statistics) is provided.

### Methodology

## Sample preparation

PBMCs were isolated with vacutainer cell preparation tubes (CPTs) (Becton Dickinson, Franklin Lakes, NJ) from fasting blood samples in the non-obese and obese patients pre-surgery and in the obese patients after 3 months follow-up of surgery. Periumbilical adipose tissue samples at the omental region were obtained from 21 obese subjects, 20 obese T2D patients, and 24 control subjects perioperatively. Adipose tissue samples (approximately 10 g) were collected and transported to laboratory immediately. For human SVFs preparation, fresh adipose samples were cut into small pieces and digested with 0.1% type II collagenase (Sigma-Aldrich, USA). Mouse SVFs were prepared using 0.1% type I collagenase. Intracellular cytokine staining was performed with Cytotfix/Cytoperm Plus kit (BD Biosciences)

## Instrument

Samples were analyzed on an LSR II Fortessa flow-cytometer (BD, Bioscience) or sorted on a FACSAria III flow-cytometer (BD Biosciences)

## Software

Data were analyzed with FACSDiva software (BD, Bioscience) or Flowjo software version 9.6.4 (Tree Star, Inc.).

## Cell population abundance

We provided FACS-gating strategies for all flow cytometry analysis and FACS cell sorting that confirm the abundance of the analyzed or sorted relevant cell populations.

## Gating strategy

We provided FACS-gating strategies for all flow cytometry analysis and FACS cell sorting, specifying the preliminary FSC/SSC gates and how positive and negative staining cell populations are defined.

- Tick this box to confirm that a figure exemplifying the gating strategy is provided in the Supplementary Information.
